# Supplementary material for: MicroRNA-532-5p Regulates Pericyte Function by Targeting the Transcription Regulator BACH1 and Angiopoietin-1
Source: PubMed Central journal article supplement (PMC6277430; doi:10.1016/j.ymthe.2018.08.020), 2018-09-01
Supplement: mmc1.pdf [file mmc1.pdf]

YMTHE, Volume 26

## **Supplemental Information**

### **MicroRNA-532-5p Regulates Pericyte Function**

**by Targeting the Transcription Regulator**

### **BACH1 and Angiopoietin-1**

**Sadie C. Slater, Eva Jover, Andrea Martello, Tijana Mitić, Iker Rodriguez-Arabaolaza, Rosa Vono, Valeria V. Alvino, Simon C. Satchell, Gaia Spinetti, Andrea Caporali, and Paolo Madeddu**

**Figure S1**

**A FACS demonstrating human APC antigenic profile**

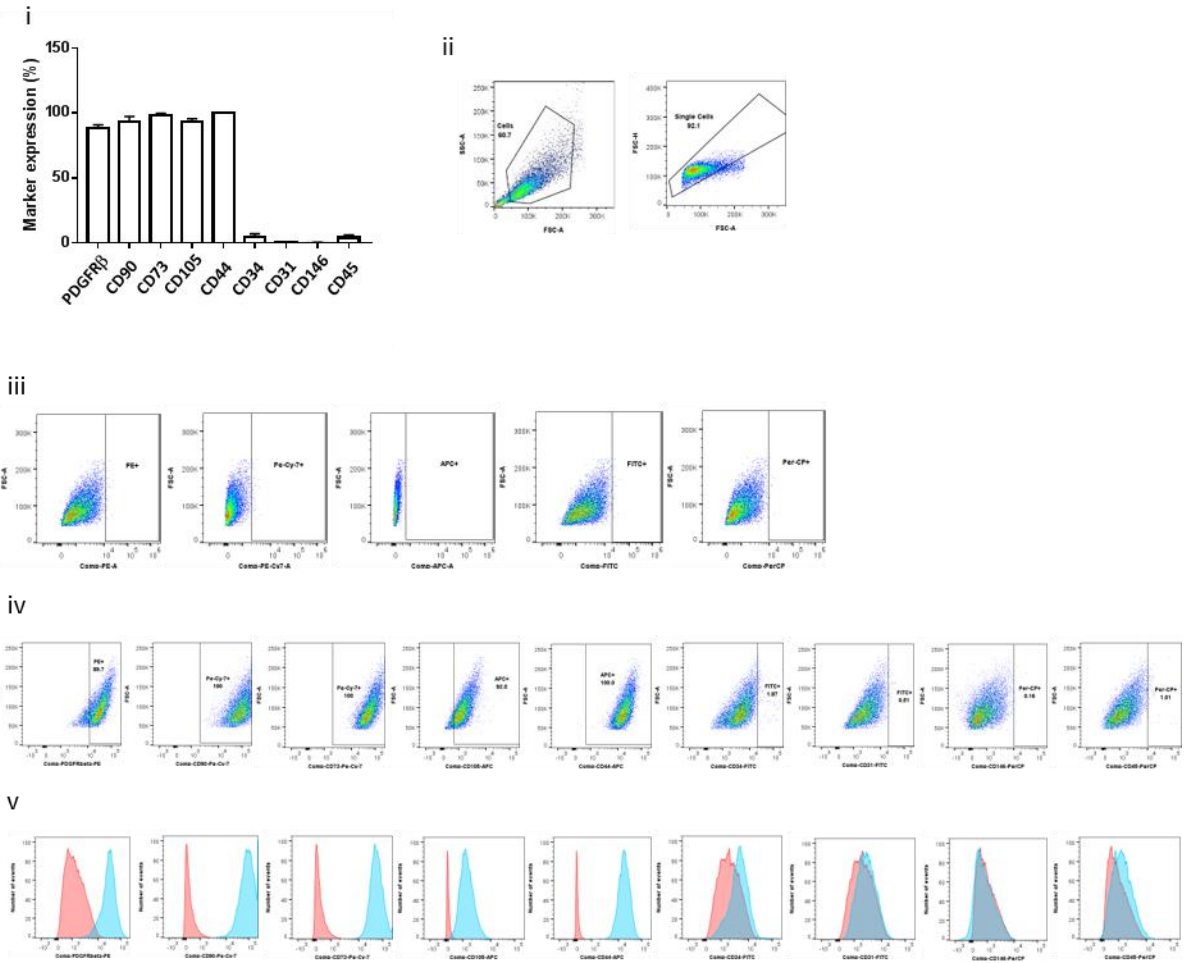

**B Immunofluorescent staining demonstrating human APC antigenic profile**

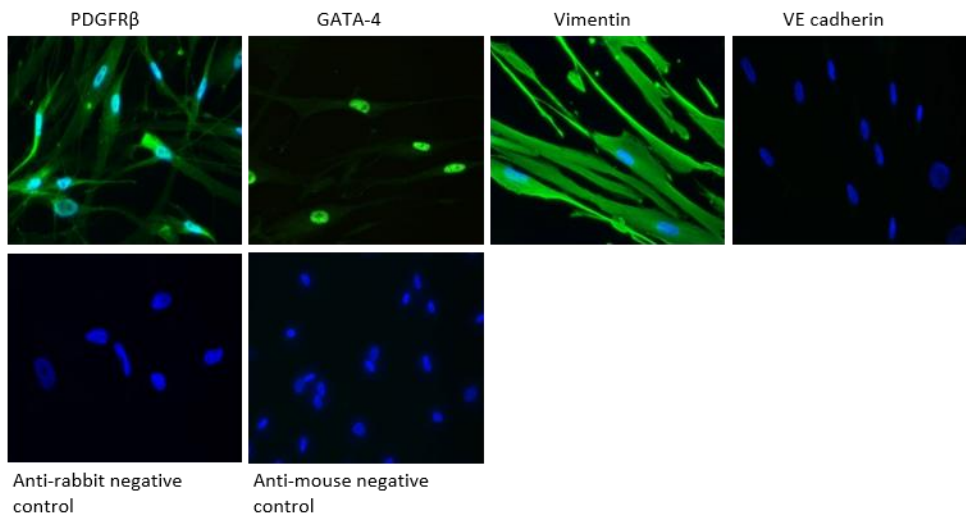

**C Muscle pericytes characterization**

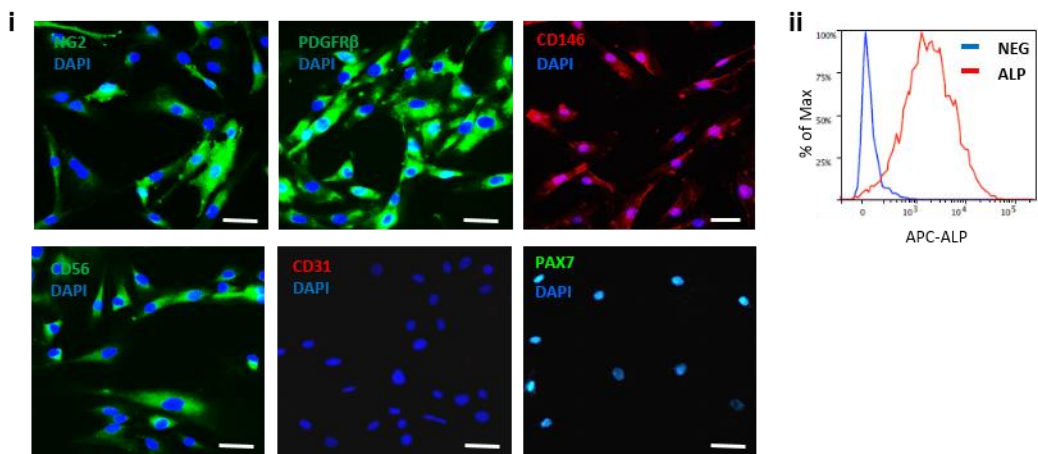

**Supplemental Figure 1. S1A: Flow cytometry analyses of adventitial pericytes isolated from human saphenous veins.** (i). Bar graphs show the mean $\pm$ SE values of three human adventitial pericytes (APC) lines. Representative images of flow cytometry gating procedure for a single APC line at P5 are shown. (ii) Total cell populations and the single cells (singlets), were gated according to FSC-A vs. SSC-A and FSC-A vs. FSC-H parameters. Cells were further gated for negative (iii) and positive controls (iv) of selected antigens. Pericyte, mesenchymal, endothelial, and hematopoietic markers were studied. (v) Flow cytometry histograms for each surface marker in representative human APC line. Negative control staining profiles are shown by the red histograms, whereas specific antibody staining profiles are shown by light blue histograms. **S1B: Immunofluorescent analyses of APCs isolated from human saphenous veins.** Representative images from a single APC line stained for PDGFR $\beta$ , GATA-4, vimentin and VE-cadherin. x40 magnification. Blue staining: DAPI, green staining: protein of interest. **Figure S1C: Characterization of muscular pericytes** Skeletal muscle pericytes (MPCs) were isolated from human sartorius muscle biopsies. The phenotypical characterization was carried out by immunofluorescence staining (i) for the typical pericyte markers NG2, CD146 and PDGFR $\beta$ . In addition, MPCs show positivity for the muscle marker CD56 and negativity for the expression of the endothelial (CD31) and satellite cell (PAX7) markers. (ii) FACS analysis shows that MPCs express alkaline fosfatase (ALP- red line). The blue line shows the negative control (NEG) as a reference.

Figure S2

Effect of miR-532-5p modulation on VEGF-A gene expression

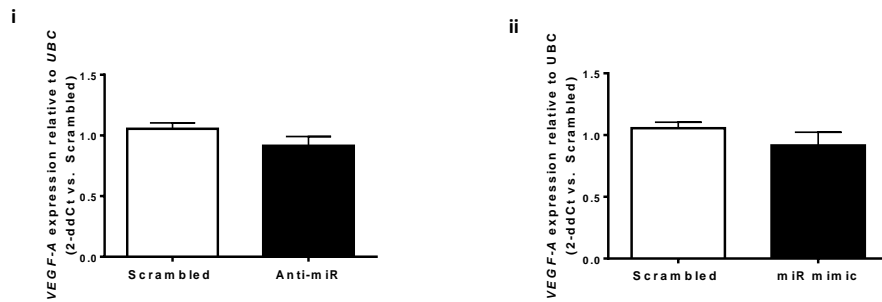

Supplemental Figure 2. Effect of miR-532-5p modulation on VEGF-A expression: (i) VEGFA mRNA levels in APCs transfected with scrambled sequence or miR-532-5p anti-miR. (ii) VEGFA mRNA levels in APCs transfected with scrambled sequence or miR-532-5p mimic; N=5 biological replicates per group. P=N.S. for both comparisons. All values are means±SE.

Figure S3

qPCR validation of predicted miR-532-5p target genes

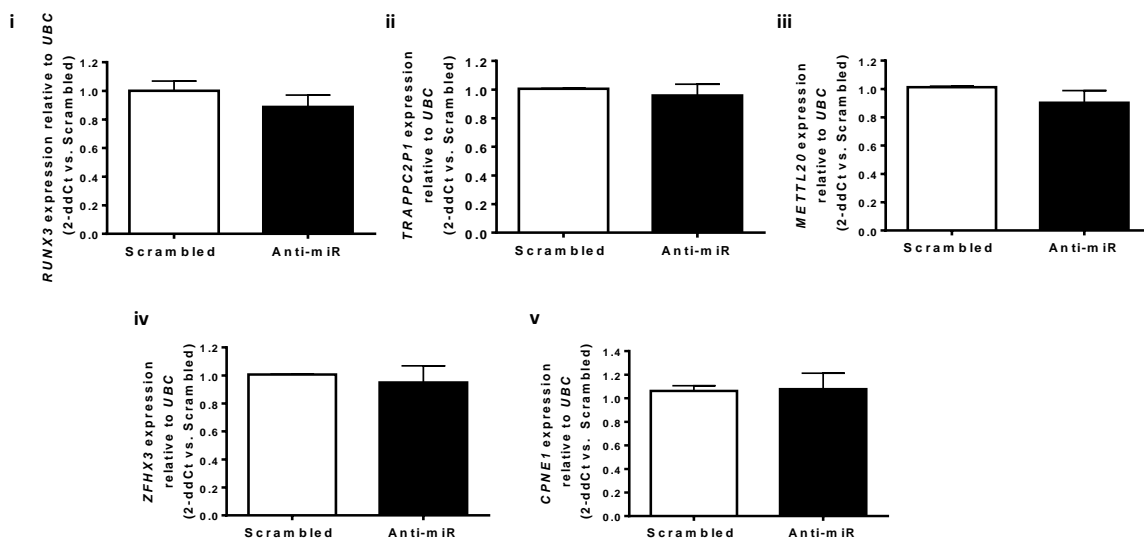

Supplemental Figure 3. Inhibition of miR-532-5p does not affect the expression of genes predicted by in silico analysis: (i) RUNX3, (ii) TRAPPC2P1, (iii) METTL20, (iv) ZFH3 or (v) CPNE1 expression remain unaltered upon miR-532-5p inhibition. P=N.S. for any of the tested genes; N=6-8 biological replicates. All values are means±SE.

Figure S4

A

Effects of miR-532-5p inhibition on HIF1AN and EGLN1 expression

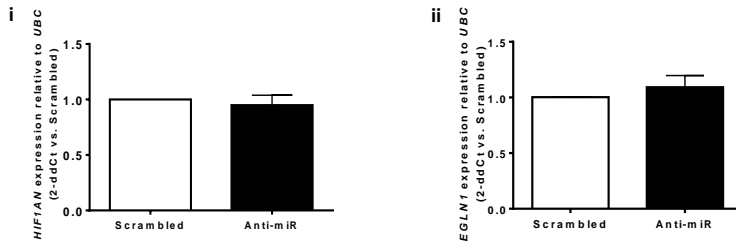

B

Effects of miR-532-5p overexpression on HIF1AN and EGLN1 expression

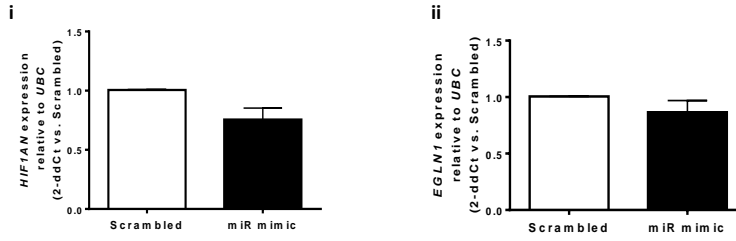

**Supplemental Figure 4. Validation of *in silico* predicted targets for the miR-532/Ang-1 axis.** *In silico* analysis identified BACH1, HIF1AN and EGLN1 as possible regulators. qPCR demonstrated (A) inhibition of miR-532 had no effect on *HIF1AN* (i) or *EGLN1* (ii) expression. (B) Likewise, overexpression of miR-532 had no effect on *HIF1AN* (i) or *EGLN1* (ii) expression; N=3 replicates. All values are means±SE

**Supplemental table 1**

| Patient ID                     | Age        | Gender        | Pathology        |     |     |     |     |     |     |     |     |     |
|--------------------------------|------------|---------------|------------------|-----|-----|-----|-----|-----|-----|-----|-----|-----|
|                                |            |               | Smoker           | DM  | MI  | HPT | HPC | CPD | CHF | AF  | PCI |     |
| <b>APC</b>                     |            |               |                  |     |     |     |     |     |     |     |     |     |
| 5.4.13H                        |            | M             |                  |     |     |     |     |     |     |     |     |     |
| 15.4.13                        |            | M             | Yes              | Yes | No  | Yes | No  | No  | No  | No  | No  | No  |
| 29.5.13                        | 85         | M             | Ex >1 month      | Yes | Yes | Yes | Yes | Yes | No  | Yes | No  | No  |
| 12.6.13                        | 71         | M             | Ex >1 month      | No  | No  | Yes | No  | No  | No  | No  | No  | No  |
| 19.6.13                        |            | M             | Ex >1 month      | No  | Yes | Yes | Yes | Yes | No  | No  | No  | No  |
| 9.7.13D                        | 59         | M             | Ex >1 month      | Yes | Yes | Yes | Yes | No  | No  | No  | No  | No  |
| 15.11.13C                      |            | M             | Ex >1 month      | No  | Yes | Yes | Yes | No  | No  | No  | No  | No  |
| 15.12.13B                      |            | M             |                  |     |     |     |     |     |     |     |     |     |
| 8.5.14D                        | 40         | M             | Yes              | No  | Yes | Yes | Yes | No  | No  | No  | No  | No  |
| 30.4.14C                       | 75         | M             | No               | No  | No  | Yes | Yes | No  | No  | No  | No  | No  |
| 30.4.14G                       | 63         | M             | Ex >1 month      | No  | No  | Yes | Yes | No  | No  | No  | No  | No  |
| 8.7.14A                        | 61         | M             | Ex >1 month      | No  | Yes | Yes | Yes | No  | No  | No  | No  | No  |
| 16.10.14A                      | 67         | M             | Ex >1 month      | No  | No  | Yes | Yes | No  | No  | No  | No  | No  |
| 28.10.14C                      | 82         | M             | No               | No  | No  | Yes | Yes | No  | No  | No  | No  | No  |
| 9.2.15B                        | 82         | M             | No               | No  | Yes | Yes | Yes | No  | No  | No  | No  | No  |
| 20.2.15B                       | 67         | M             | Yes              | No  | Yes | Yes | Yes | Yes | No  | No  | No  | No  |
| 13.3.15A                       | 56         | M             | Yes              | No  | Yes | Yes | No  | No  | No  | No  | No  | No  |
| 30.3.15A                       | 79         | M             | Ex >1 month      | No  | Yes | No  | Yes | No  | No  | No  | No  | No  |
| 29.4.15C                       | 63         | M             | No               | No  | Yes | Yes | Yes | No  | No  | No  | No  | Yes |
| 10.6.15B                       | 69         | M             | Ex >1 month      | No  | Yes | Yes | Yes | No  | No  | No  | No  | No  |
| 15.9.15B                       | 64         | M             | Ex >1 month      | No  | Yes | Yes | Yes | No  | No  | No  | No  | No  |
| 15.9.15C                       | 41         | M             | No               | No  | No  | No  | Yes | No  | No  | No  | No  | No  |
| 17.11.15B                      | 67         | M             | Yes              | No  | Yes | No  | Yes | No  | No  | No  | No  | No  |
| 13.10.15E                      | 72         | M             | Ex >1 month      | No  | Yes | Yes | Yes | No  | No  | No  | No  | No  |
| 12.1.16A                       | 80         | M             | Ex >1 month      | Yes | No  | Yes | Yes | No  | No  | No  | No  | Yes |
| 9.2.16B                        | 73         | M             | Ex >1 month      | No  | Yes | Yes | Yes | No  | No  | No  | No  | No  |
| 9.2.16C                        | 57         | M             | No               | Yes | Yes | Yes | Yes | No  | No  | No  | No  | No  |
| 5.3.16A                        | 64         | M             | Yes              | No  | No  | Yes | Yes | No  | No  | No  | No  | No  |
| 1.4.16B                        | 80         | M             | Yes              | No  | No  | Yes | Yes | No  | No  | No  | No  | No  |
| 5.4.16A                        | 71         | M             | No               | No  | No  | Yes | Yes | No  | No  | No  | No  | No  |
| 4.10.16B                       | 75         | M             | Ex               | No  | Yes | Yes | Yes | No  | No  | No  | No  | No  |
| 4.10.16C                       | 57         | M             | Yes              | No  | Yes | Yes | Yes | No  | No  | No  | No  | Yes |
| <b>Muscle pericytes donors</b> |            |               |                  |     |     |     |     |     |     |     |     |     |
| <b>Patient ID</b>              | <b>Age</b> | <b>Gender</b> | <b>Pathology</b> |     |     |     |     |     |     |     |     |     |
| MP36                           | 34         | M             | CTRL             |     |     |     |     |     |     |     |     |     |
| MP37                           | 53         | F             | CTRL             |     |     |     |     |     |     |     |     |     |
| MP40                           | 44         | M             | CTRL             |     |     |     |     |     |     |     |     |     |
| MP 20                          | 58         | F             | CTRL             |     |     |     |     |     |     |     |     |     |
| MP 46                          | 46         | M             | CTRL             |     |     |     |     |     |     |     |     |     |
| MP57                           | 57         | F             | CTRL             |     |     |     |     |     |     |     |     |     |
| MP 67                          | 67         | F             | CTRL             |     |     |     |     |     |     |     |     |     |
| MP 73                          | 73         | F             | CTRL             |     |     |     |     |     |     |     |     |     |
| MP 7                           | 51         | M             | T2D+CLI          |     |     |     |     |     |     |     |     |     |
| MP 10                          | 76         | M             | T2D+CLI          |     |     |     |     |     |     |     |     |     |
| MP12                           | 84         | F             | T2D+CLI          |     |     |     |     |     |     |     |     |     |
| MP18                           | 67         | F             | T2D+CLI          |     |     |     |     |     |     |     |     |     |
| MP22                           | 86         | M             | T2D+CLI          |     |     |     |     |     |     |     |     |     |
| MP14                           | 80         | M             | CLI              |     |     |     |     |     |     |     |     |     |
| MP23                           | 77         | M             | CLI              |     |     |     |     |     |     |     |     |     |
| MP24                           | 85         | F             | CLI              |     |     |     |     |     |     |     |     |     |

**Table S1. Clinical characteristics of patient donors.** APCs and MPCs were isolated as previously described. *Abbreviations:* Ex = Ex-smoker (patient that stopped smoking at least one month before the surgery); DM = Diabetes Mellitus; MI = Myocardial Infarction; HPT = Hypertension; HPC = Hypercholesterolemia; CPD = Chronic Pulmonary Disease; CHF = Congestive Heart Failure; AF = Atrial Fibrillation; PCI = Percutaneous Coronary Intervention; CTRL = no pathology; CLI = critical limb ischemia; T2D+CLI = type 2 diabetes + CLI.
